# Supplementary material
Source: publisher figshare collection journal article supplement (https://karger.figshare.com/ndownloader/files/20177864)

## Synergistic ototoxicity of gentamicin and low-dose irradiation: molecular basis and clinical significance

### Supplementary data

**Fig S1. Gentamicin treatment reduced cell viability at 72h post-treatment in OC-k3 mouse cochlear cell line as determined by MTS assay.** OC-k3 cells were treated with different doses of gentamicin and monitored for cell viability using MTS assay at 72h post-treatment. Data was combined from two independent experiments by setting the mean value of OD reading at 490nm as 100% cell viability for cells with no treatment (0 mg/ml gentamicin). Data was expressed as means  $\pm$  S.E.M.

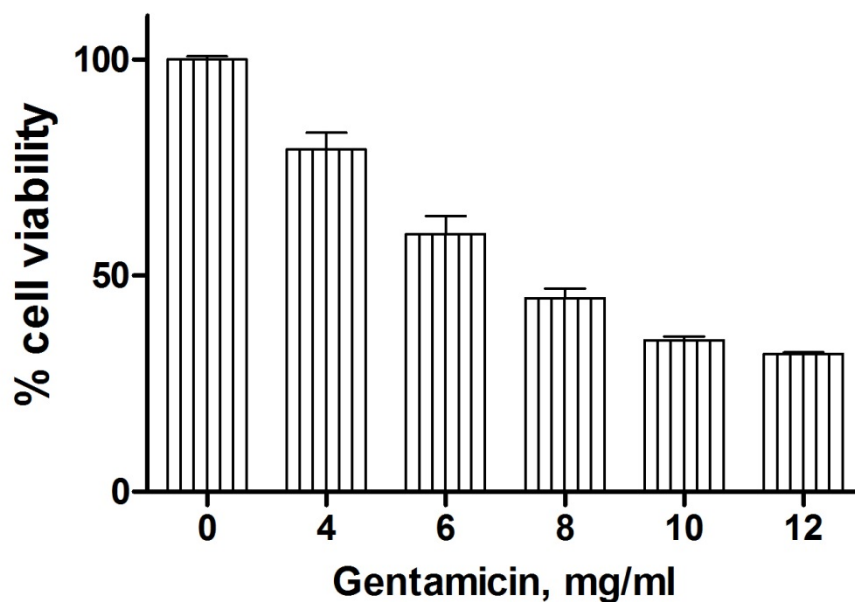

**Fig S2. Combined treatment of gentamicin and low-dose irradiation for 72 h resulted in reduction of cell numbers as determined by phase contrast images. OC-k3 cells were subjected to no treatment (NT), 6 mg/ml gentamicin (G), 5 Gy radiation (R) or both (G+R).**

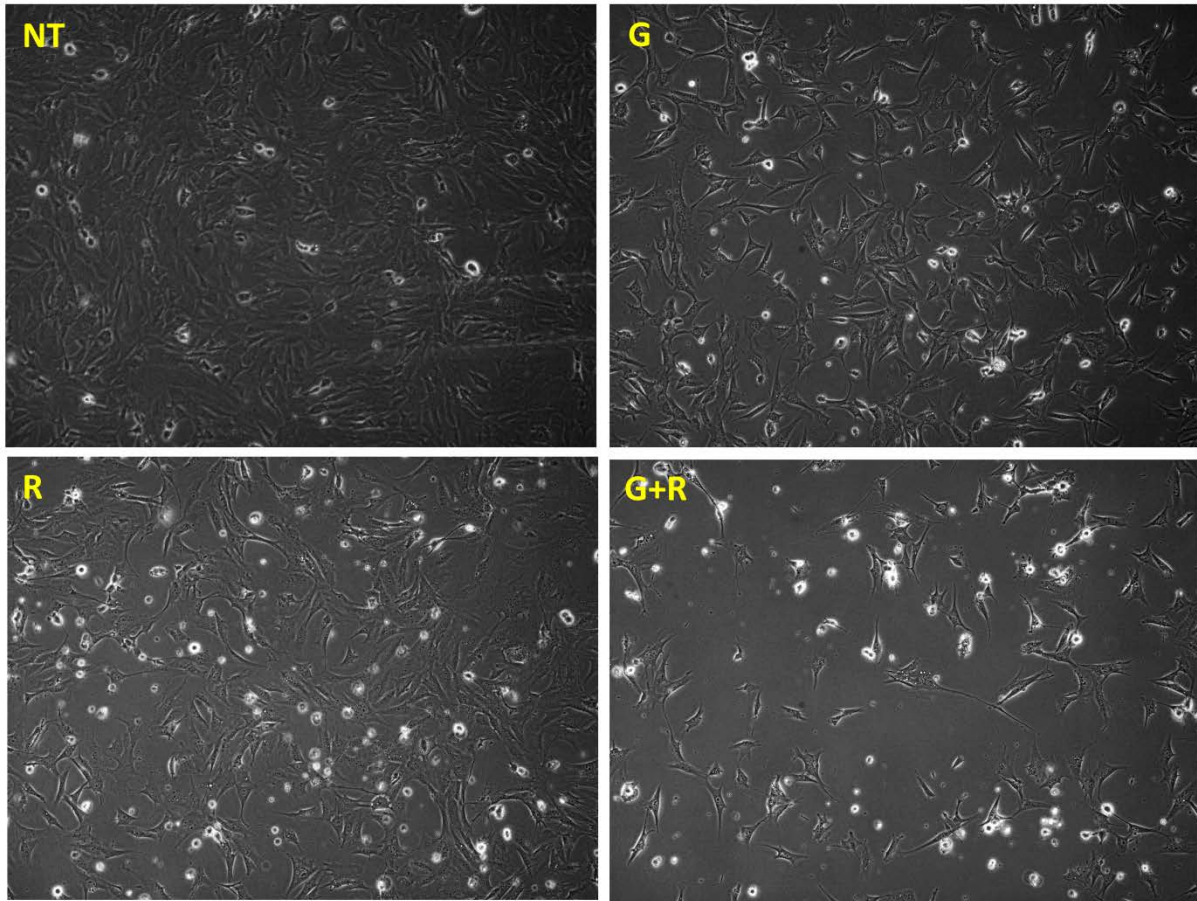

**Fig S3. Full scans of the immunoblots presented in the paper.** The red rectangles indicate the cropped images presented in the paper.

**(A) Full scan immunoblots in Fig 5A**

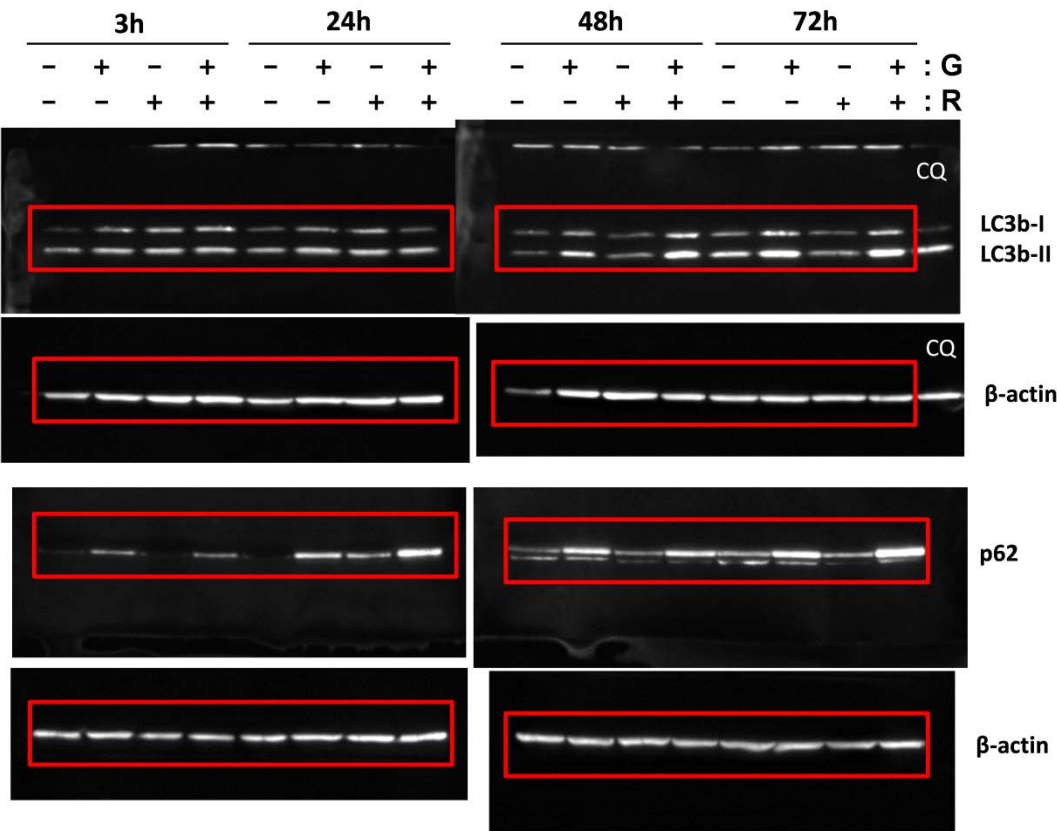

**(B) Full scan immunoblots in upper panel of Fig 6A**

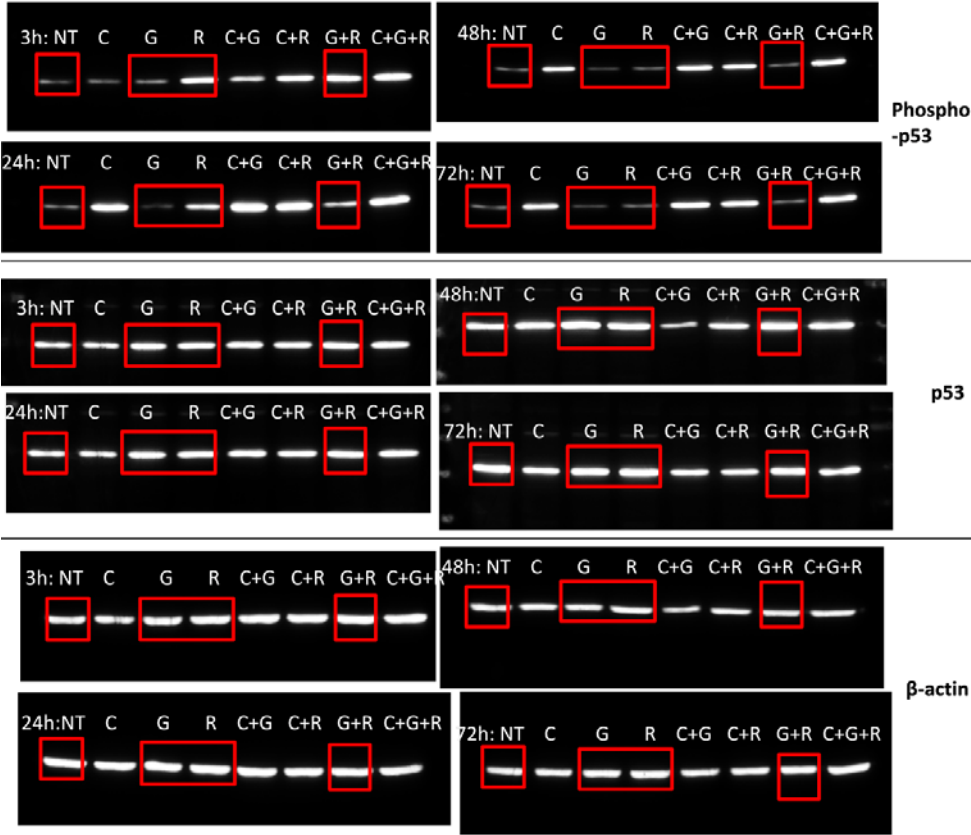

**(C) Full scan immunoblots in lower panel of Fig 6A**

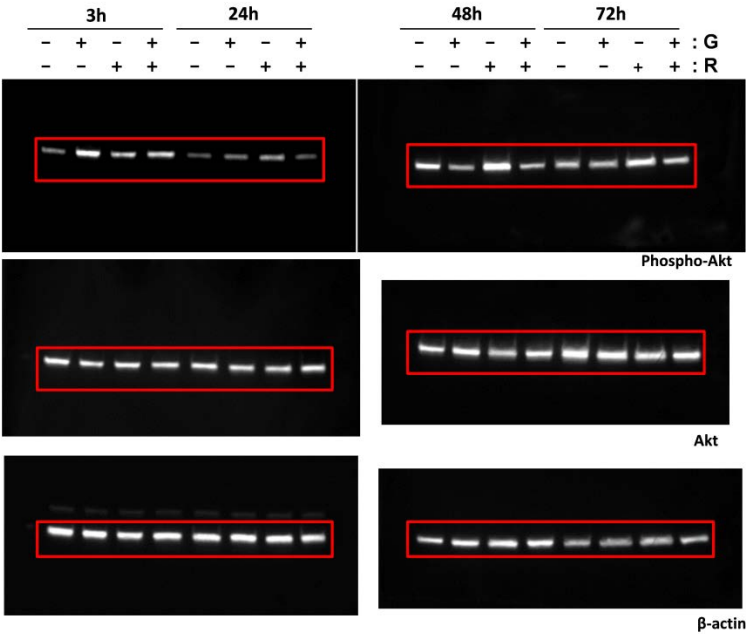

Supplement: Supplementary file 1 [file 20177864]
